# Supplementary material for: Primary Failure to an Anti-TNF Agent in Inflammatory Bowel Disease: Switch (to a Second Anti-TNF Agent) or Swap (for Another Mechanism of Action)?
Source: MDPI journal article supplement (doi:10.3390/jcm10225318), 2021-11-15
Supplement: s1 [file s1]

**Table S1.** Criteria used for primary failure by the studies (included in Table 1) which reported their results stratified by type of failure (primary vs. secondary).

| Author            | Criteria for primary failure                                                                                                                                                                                                                                                                                                                                                                                                                                                |
|-------------------|-----------------------------------------------------------------------------------------------------------------------------------------------------------------------------------------------------------------------------------------------------------------------------------------------------------------------------------------------------------------------------------------------------------------------------------------------------------------------------|
| Casanova [21]     | It was considered that the patient had a primary failure if she/he did not achieve remission after having received the induction doses of the anti-TNF (non-responders and partial responders)                                                                                                                                                                                                                                                                              |
| Chaparro [22]     | For luminal disease, response to adalimumab and infliximab was evaluated using the Harvey-Bradshaw index (HBI) four weeks after the first dose. Partial response was defined as a decrease in the HBI of more than 3 points. Remission was defined as a HBI below or equal to 4 without steroids. In perianal Crohn's disease, complete response was defined as closure of all fistulas and partial response as a 50% or more reduction in the number of draining fistulas. |
| Cordero Ruiz [24] | No specific definition was provided (just stated "lack of initial response to infliximab")                                                                                                                                                                                                                                                                                                                                                                                  |
| Cozijnsen [25]    | No specific definition was provided (just stated "non-response to infliximab")                                                                                                                                                                                                                                                                                                                                                                                              |
| Favale [26]       | Primary failure was defined as the lack of clinical response based on physician's global assessment (PGA) within 10 weeks from the first induction dose.                                                                                                                                                                                                                                                                                                                    |
| Fumery [27]       | Primary failure was defined as the absence of clinical remission or clinical response at 6 months after adalimumab initiation                                                                                                                                                                                                                                                                                                                                               |
| Garcia-Bosch [28] | No specific definition was provided (just stated "primary non-responders to infliximab")                                                                                                                                                                                                                                                                                                                                                                                    |
| Lichtiger [31]    | Primary non-responders to infliximab were defined as patients who never responded to their initial exposure to infliximab                                                                                                                                                                                                                                                                                                                                                   |
| Lofberg [32]      | Classification of study subjects as primary non-responders to infliximab was determined by the investigator                                                                                                                                                                                                                                                                                                                                                                 |
| Seiderer [35]     | No specific definition was provided (just stated "infliximab-refractory")                                                                                                                                                                                                                                                                                                                                                                                                   |
| Sprakes [36]      | Primary non-response was defined as individuals who did not respond to the standard three dose induction with infliximab                                                                                                                                                                                                                                                                                                                                                    |
| Viola [39]        | No specific definition was provided (just stated "patients unresponsive to adalimumab or golimumab who were switched to infliximab")                                                                                                                                                                                                                                                                                                                                        |
